# Supplementary material for: Strigolactone synthesis is ancestral in land plants, but canonical strigolactone signalling is a flowering plant innovation
Source: PubMed Central journal article supplement (PMC6728956; doi:10.1186/s12915-019-0689-6), 2019-09-05
Supplement: 12915_2019_689_MOESM18_ESM.pdf [file 12915_2019_689_MOESM18_ESM.pdf]

## Additional File 18

| Gene family | Sequence number | Length     |            |
|-------------|-----------------|------------|------------|
|             |                 | Nucleotide | Amino acid |
| D27         | 44              | 1134       | 197        |
| CCD7        | 30              | 3467       | 537        |
| CCD8        | 37              | 2723       | 474        |
| MAX1        | 26              | 1904       | 505        |
| LBO         | 50              | 852        | 286        |
| SMXL        | 212             | 5862       | 455        |

Summary of final alignments produced for each gene family studied.
